# Supplementary material for: Proteome Changes Reveal the Protective Roles of Exogenous Citric Acid in Alleviating Cu Toxicity in Brassica napus L
Source: MDPI journal article supplement (doi:10.3390/ijms22115879), 2021-05-30
Supplement: s1 [file s1]

**Table S5. KEGG pathways of the total identified proteins in *B. napus* seedlings in response to CA-mediated Cu stress using DAVID Bioinformatics**

| Pathway ID | Pathway Name                                | Number of proteins | Frequency | <i>p</i> -value | Fold Enrichment |
|------------|---------------------------------------------|--------------------|-----------|-----------------|-----------------|
| ath01100   | Metabolic pathways                          | 260                | 15.84     | 1.21E-07        | 1.274708087     |
| ath01110   | Biosynthesis of secondary metabolites       | 147                | 8.96      | 1.91E-04        | 1.2964119       |
| ath03010   | Ribosome                                    | 123                | 7.50      | 1.09E-33        | 3.04507746      |
| ath01130   | Biosynthesis of antibiotics                 | 106                | 6.46      | 6.26E-16        | 2.169907411     |
| ath01200   | Carbon metabolism                           | 88                 | 5.36      | 2.43E-23        | 3.018430906     |
| ath01230   | Biosynthesis of amino acids                 | 68                 | 4.14      | 2.11E-12        | 2.405886051     |
| ath00630   | Glyoxylate and dicarboxylate metabolism     | 38                 | 2.32      | 4.50E-17        | 4.614787792     |
| ath00190   | Oxidative phosphorylation                   | 34                 | 2.07      | 3.33E-04        | 1.886095855     |
| ath00710   | Carbon fixation in photosynthetic organisms | 33                 | 2.01      | 1.07E-13        | 4.297983138     |
| ath00010   | Glycolysis/Gluconeogenesis                  | 33                 | 2.01      | 2.89E-07        | 2.624432181     |
| ath00195   | Photosynthesis                              | 29                 | 1.77      | 3.90E-09        | 3.384598291     |
| ath00020   | Citrate cycle (TCA cycle)                   | 27                 | 1.65      | 5.76E-10        | 3.851439435     |
| ath00620   | Pyruvate metabolism                         | 27                 | 1.65      | 5.85E-07        | 2.888579576     |
| ath03050   | Proteasome                                  | 24                 | 1.46      | 1.46E-08        | 3.718631179     |
| ath04145   | Phagosome                                   | 22                 | 1.34      | 2.82E-04        | 2.325967345     |
| ath00260   | Glycine, serine and threonine metabolism    | 21                 | 1.28      | 6.87E-05        | 2.621118504     |
| ath00030   | Pentose phosphate pathway                   | 18                 | 1.10      | 4.24E-05        | 2.995564005     |
| ath00480   | Glutathione metabolism                      | 18                 | 1.10      | 0.025387323     | 1.739359745     |

|          |                                             |    |      |             |             |
|----------|---------------------------------------------|----|------|-------------|-------------|
| ath00270 | Cysteine and methionine metabolism          | 18 | 1.10 | 0.04354577  | 1.633944003 |
| ath01210 | 2-Oxocarboxylic acid metabolism             | 17 | 1.04 | 0.006184085 | 2.064510328 |
| ath00860 | Porphyrin and chlorophyll metabolism        | 15 | 0.91 | 4.89E-04    | 2.808341255 |
| ath00196 | Photosynthesis - antenna proteins           | 13 | 0.79 | 7.08E-07    | 5.310318009 |
| ath00250 | Alanine, aspartate and glutamate metabolism | 13 | 0.79 | 0.005063208 | 2.433895754 |
| ath00051 | Fructose and mannose metabolism             | 12 | 0.73 | 0.07690666  | 1.739359745 |
| ath00220 | Arginine biosynthesis                       | 9  | 0.55 | 0.034432647 | 2.310863661 |
| ath00053 | Ascorbate and aldarate metabolism           | 9  | 0.55 | 0.077890851 | 1.972688491 |
| ath00910 | Nitrogen metabolism                         | 9  | 0.55 | 0.087352042 | 1.925719718 |
| ath00670 | One carbon pool by folate                   | 7  | 0.43 | 0.018109329 | 3.145342205 |
| ath00261 | Monobactam biosynthesis                     | 6  | 0.37 | 0.014132619 | 3.851439435 |
| ath00300 | Lysine biosynthesis                         | 6  | 0.37 | 0.019305272 | 3.594676806 |
| ath00450 | Selenocompound metabolism                   | 6  | 0.37 | 0.041682918 | 2.995564005 |
