# Supplementary material for: Proteome Changes Reveal the Protective Roles of Exogenous Citric Acid in Alleviating Cu Toxicity in Brassica napus L
Source: MDPI journal article supplement (doi:10.3390/ijms22115879), 2021-05-30
Supplement: s1 [file s1]

**Table S6. Significantly enriched GO terms for the DAPs among the treatment groups in *B. napus* under CA-mediated Cu stress**

| GO ID                     | GO Name                                             | Number of proteins | Frequency | p-value    | Fold Enrichment |
|---------------------------|-----------------------------------------------------|--------------------|-----------|------------|-----------------|
| <b>Control vs CA</b>      |                                                     |                    |           |            |                 |
| <b>Biological Process</b> |                                                     |                    |           |            |                 |
| GO:0046686                | Response to metal ion                               | 17                 | 9.71      | 3.77E-15   | 15.85415406     |
| GO:0009651                | Response to stress                                  | 10                 | 5.71      | 1.57E-05   | 6.58984041      |
| GO:0055114                | Oxidation-reduction process                         | 10                 | 5.71      | 0.01967803 | 2.398107337     |
| GO:0009735                | Response to cytokinin                               | 9                  | 5.14      | 8.60E-08   | 15.68598078     |
| GO:0009409                | Response to cold                                    | 7                  | 4.00      | 3.08E-04   | 7.467016492     |
| GO:0018298                | Protein-chromophore linkage                         | 6                  | 3.43      | 2.58E-07   | 42.52643678     |
| GO:0015979                | Photosynthesis                                      | 6                  | 3.43      | 6.59E-05   | 13.86731634     |
| GO:0015986                | ATP synthesis coupled proton transport              | 5                  | 2.86      | 6.15E-06   | 40.8908046      |
| GO:0009772                | Photosynthetic electron transport in photosystem II | 4                  | 2.29      | 2.30E-06   | 141.7547893     |
| GO:0015991                | ATP hydrolysis coupled proton transport             | 4                  | 2.29      | 2.34E-04   | 32.71264368     |
| GO:0042742                | Defense response to bacterium                       | 4                  | 2.29      | 0.05332936 | 4.622438781     |
| GO:0006979                | Response to oxidative stress                        | 4                  | 2.29      | 0.06058321 | 4.38416874      |
| GO:0009765                | Photosynthesis, light harvesting                    | 3                  | 1.71      | 7.12E-04   | 73.60344828     |
| GO:0009768                | Photosynthesis, light harvesting in photosystem I   | 3                  | 1.71      | 0.0020711  | 43.49294671     |
| GO:0010043                | Response to zinc ion                                | 3                  | 1.71      | 0.01162306 | 18.05367599     |
| GO:0007264                | Small gtpase mediated signal transduction           | 3                  | 1.71      | 0.04673136 | 8.543257389     |
| GO:0006734                | NADH metabolic process                              | 2                  | 1.14      | 0.01834812 | 106.316092      |
| GO:0006107                | Oxaloacetate metabolic process                      | 2                  | 1.14      | 0.01834812 | 106.316092      |
| GO:0009645                | Response to low light intensity stimulus            | 2                  | 1.14      | 0.02137381 | 91.12807882     |
| GO:0006094                | Gluconeogenesis                                     | 2                  | 1.14      | 0.04229863 | 45.56403941     |
| GO:0019344                | Cysteine biosynthetic process                       | 2                  | 1.14      | 0.05113127 | 37.52332657     |
| GO:0006108                | Malate metabolic process                            | 2                  | 1.14      | 0.05697518 | 33.57350272     |
| GO:0019253                | Reductive pentose-phosphate cycle                   | 2                  | 1.14      | 0.05988386 | 31.89482759     |

|                           |                                                               |    |       |                |             |
|---------------------------|---------------------------------------------------------------|----|-------|----------------|-------------|
| GO:0006913                | Nucleocytoplasmic transport                                   | 2  | 1.14  | 0.0685571<br>2 | 27.73463268 |
| GO:0019252                | Starch biosynthetic process                                   | 2  | 1.14  | 0.0941079<br>3 | 19.93426724 |
| <b>Cellular Component</b> |                                                               |    |       |                |             |
| GO:0009507                | Chloroplast                                                   | 39 | 22.29 | 6.56E-18       | 4.311956737 |
| GO:0005829                | Cytosol                                                       | 28 | 16.00 | 1.34E-13       | 5.168544604 |
| GO:0009570                | Chloroplast stroma                                            | 24 | 13.71 | 8.40E-22       | 15.66506606 |
| GO:0009535                | Chloroplast thylakoid membrane                                | 19 | 10.86 | 9.61E-19       | 19.89726398 |
| GO:0005737                | Cytoplasm                                                     | 19 | 10.86 | 0.0084971<br>3 | 1.837573506 |
| GO:0009941                | Chloroplast envelope                                          | 18 | 10.29 | 3.23E-15       | 14.12885102 |
| GO:0005886                | Plasma membrane                                               | 18 | 10.29 | 0.0032812<br>8 | 2.072384144 |
| GO:0005739                | Mitochondrion                                                 | 17 | 9.71  | 0.0035729<br>6 | 2.127347552 |
| GO:0048046                | Apoplast                                                      | 16 | 9.14  | 2.78E-13       | 13.80470734 |
| GO:0009506                | Plasmodesma                                                   | 16 | 9.14  | 5.91E-09       | 6.765402206 |
| GO:0005794                | Golgi apparatus                                               | 15 | 8.57  | 5.38E-07       | 5.214767606 |
| GO:0016020                | Membrane                                                      | 13 | 7.43  | 6.98E-04       | 3.083396999 |
| GO:0005618                | Cell wall                                                     | 11 | 6.29  | 8.61E-07       | 7.973509743 |
| GO:0009579                | Thylakoid                                                     | 10 | 5.71  | 1.05E-09       | 20.69030772 |
| GO:0005773                | Vacuole                                                       | 8  | 4.57  | 5.89E-04       | 5.42092641  |
| GO:0009523                | Photosystem II                                                | 7  | 4.00  | 4.17E-10       | 74.58855932 |
| GO:0005774                | Vacuolar membrane                                             | 7  | 4.00  | 0.0014436<br>8 | 5.566310397 |
| GO:0022626                | Cytosolic ribosome                                            | 6  | 3.43  | 1.08E-04       | 12.53589232 |
| GO:0009534                | Chloroplast thylakoid                                         | 6  | 3.43  | 1.13E-04       | 12.41418463 |
| GO:0005730                | Nucleolus                                                     | 6  | 3.43  | 0.0030492<br>6 | 5.975051481 |
| GO:0009536                | Plastid                                                       | 5  | 2.86  | 0.0052607      | 7.033338927 |
| GO:0005840                | Ribosome                                                      | 5  | 2.86  | 0.0095479<br>3 | 5.91972693  |
| GO:0005622                | Intracellular                                                 | 5  | 2.86  | 0.0584051<br>4 | 3.36135914  |
| GO:0045261                | Proton-transporting ATP synthase complex, catalytic core F(1) | 3  | 1.71  | 2.32E-04       | 127.8661017 |
| GO:0030076                | Light-harvesting complex                                      | 3  | 1.71  | 9.67E-04       | 63.93305085 |
| GO:0009522                | Photosystem I                                                 | 3  | 1.71  | 0.0027971<br>2 | 37.60767697 |
| GO:0010287                | Plastoglobule                                                 | 3  | 1.71  | 0.0130248<br>6 | 17.04881356 |
| GO:0022627                | Cytosolic small ribosomal subunit                             | 3  | 1.71  | 0.0294830<br>5 | 11.0229398  |

|                           |                                                                                                                      |    |      |                |             |
|---------------------------|----------------------------------------------------------------------------------------------------------------------|----|------|----------------|-------------|
| GO:0000275                | Mitochondrial proton-transporting ATP synthase complex, catalytic core F(1)                                          | 2  | 1.14 | 0.0137604<br>4 | 142.0734463 |
| GO:0000311                | Plastid large ribosomal subunit                                                                                      | 2  | 1.14 | 0.0137604<br>4 | 142.0734463 |
| GO:0005753                | Mitochondrial proton-transporting ATP synthase complex                                                               | 2  | 1.14 | 0.0340528<br>8 | 56.82937853 |
| GO:0009654                | Photosystem II oxygen evolving complex                                                                               | 2  | 1.14 | 0.0539348<br>5 | 35.51836158 |
| GO:0010319                | Stromule                                                                                                             | 2  | 1.14 | 0.0798197      | 23.67890772 |
| GO:0030687                | Preribosome, large subunit precursor                                                                                 | 2  | 1.14 | 0.0861813<br>8 | 21.85745328 |
| <b>Molecular Function</b> |                                                                                                                      |    |      |                |             |
| GO:0046872                | Metal ion binding                                                                                                    | 14 | 8.00 | 0.0013812<br>7 | 2.684783756 |
| GO:0003735                | Structural constituent of ribosome                                                                                   | 7  | 4.00 | 0.0039652<br>7 | 4.538697591 |
| GO:0016168                | Chlorophyll binding                                                                                                  | 6  | 3.43 | 1.12E-07       | 49.94319743 |
| GO:0046933                | Proton-transporting ATP synthase activity                                                                            | 5  | 2.86 | 2.41E-06       | 51.33050847 |
| GO:0005507                | Copper ion binding                                                                                                   | 5  | 2.86 | 0.0073137<br>1 | 6.389689852 |
| GO:0005525                | GTP binding                                                                                                          | 5  | 2.86 | 0.0140490<br>6 | 5.273682378 |
| GO:0020037                | Heme binding                                                                                                         | 5  | 2.86 | 0.0346424<br>2 | 3.989417757 |
| GO:0016491                | Oxidoreductase activity                                                                                              | 5  | 2.86 | 0.0360593<br>4 | 3.938402185 |
| GO:0003924                | GTPase activity                                                                                                      | 4  | 2.29 | 0.0088220<br>4 | 9.262648146 |
| GO:0005506                | Iron ion binding                                                                                                     | 4  | 2.29 | 0.0920904<br>8 | 3.666464891 |
| GO:0045156                | Electron transporter, transferring electrons within the cyclic electron transport pathway of photosynthesis activity | 3  | 1.71 | 3.55E-04       | 102.6610169 |
| GO:0031409                | Pigment binding                                                                                                      | 3  | 1.71 | 0.0020223<br>2 | 43.99757869 |
| GO:0046961                | Proton-transporting ATPase activity, rotational mechanism                                                            | 3  | 1.71 | 0.0041126<br>3 | 30.79830508 |
| GO:0016615                | Malate dehydrogenase activity                                                                                        | 2  | 1.14 | 0.0252565<br>5 | 76.99576271 |
| GO:0030060                | L-malate dehydrogenase activity                                                                                      | 2  | 1.14 | 0.0283692      | 68.44067797 |
| GO:0070180                | Large ribosomal subunit rRNA binding                                                                                 | 2  | 1.14 | 0.0649676<br>2 | 29.33171913 |
| <b>CK vs Cu25</b>         |                                                                                                                      |    |      |                |             |

| Biological Process |                                                     |    |       |                |             |
|--------------------|-----------------------------------------------------|----|-------|----------------|-------------|
| GO:0046686         | Response to metal ion                               | 14 | 12.17 | 1.01E-12       | 16.46236969 |
| GO:0009735         | Response to cytokinin                               | 9  | 7.83  | 1.24E-08       | 19.77797577 |
| GO:0009651         | Response to stress                                  | 8  | 6.96  | 1.54E-04       | 6.64714337  |
| GO:0006412         | Translation                                         | 7  | 6.09  | 0.0528705<br>2 | 2.511208936 |
| GO:0015986         | ATP synthesis coupled proton transport              | 5  | 4.35  | 2.36E-06       | 51.55797101 |
| GO:0018298         | Protein-chromophore linkage                         | 5  | 4.35  | 4.23E-06       | 44.68357488 |
| GO:0009409         | Response to cold                                    | 5  | 4.35  | 0.0059204<br>4 | 6.724952741 |
| GO:0009772         | Photosynthetic electron transport in photosystem II | 4  | 3.48  | 1.12E-06       | 178.7342995 |
| GO:0015991         | ATP hydrolysis coupled proton transport             | 4  | 3.48  | 1.16E-04       | 41.24637681 |
| GO:0015979         | Photosynthesis                                      | 4  | 3.48  | 0.0045846<br>1 | 11.65658475 |
| GO:0042742         | Defense response to bacterium                       | 4  | 3.48  | 0.0294177<br>4 | 5.828292376 |
| GO:0006979         | Response to oxidative stress                        | 4  | 3.48  | 0.0336472<br>6 | 5.527864934 |
| GO:0007264         | Small GTPase mediated signal transduction           | 3  | 2.61  | 0.0303698<br>1 | 10.77193323 |
| GO:0006107         | Oxaloacetate metabolic process                      | 2  | 1.74  | 0.0145088<br>6 | 134.0507246 |
| GO:0006734         | NADH metabolic process                              | 2  | 1.74  | 0.0145088<br>6 | 134.0507246 |
| GO:0009645         | Response to low light intensity stimulus            | 2  | 1.74  | 0.0169069<br>1 | 114.9006211 |
| GO:0009765         | Photosynthesis, light harvesting                    | 2  | 1.74  | 0.0311758<br>3 | 61.86956522 |
| GO:0006094         | Gluconeogenesis                                     | 2  | 1.74  | 0.0335342<br>2 | 57.45031056 |
| GO:0019344         | Cysteine biosynthetic process                       | 2  | 1.74  | 0.0405757<br>4 | 47.31202046 |
| GO:0006108         | Malate metabolic process                            | 2  | 1.74  | 0.0452421<br>9 | 42.33180778 |
| GO:0019253         | Reductive pentose-phosphate cycle                   | 2  | 1.74  | 0.0475670<br>9 | 40.21521739 |
| GO:0009768         | Photosynthesis, light harvesting in photosystem I   | 2  | 1.74  | 0.0522002<br>9 | 36.55928854 |
| GO:0006913         | Nucleocytoplasmic transport                         | 2  | 1.74  | 0.0545086<br>2 | 34.96975425 |
| GO:0019252         | Starch biosynthetic process                         | 2  | 1.74  | 0.0750377<br>3 | 25.13451087 |
| GO:0009567         | Double fertilization forming a zygote and endosperm | 2  | 1.74  | 0.0817834<br>2 | 22.98012422 |

|                           |                                                                             |    |       |                |             |
|---------------------------|-----------------------------------------------------------------------------|----|-------|----------------|-------------|
| GO:0006606                | Protein import into nucleus                                                 | 2  | 1.74  | 0.0973368<br>4 | 19.15010352 |
| <b>Cellular Component</b> |                                                                             |    |       |                |             |
| GO:0009507                | Chloroplast                                                                 | 28 | 24.35 | 1.93E-11       | 3.886171593 |
| GO:0005829                | Cytosol                                                                     | 20 | 17.39 | 6.70E-09       | 4.634409296 |
| GO:0009570                | Chloroplast stroma                                                          | 19 | 16.52 | 3.15E-17       | 15.56785377 |
| GO:0009941                | Chloroplast envelope                                                        | 16 | 13.91 | 2.36E-14       | 15.76552643 |
| GO:0005737                | Cytoplasm                                                                   | 16 | 13.91 | 0.0096045<br>6 | 1.942518913 |
| GO:0009535                | Chloroplast thylakoid membrane                                              | 15 | 13.04 | 1.01E-14       | 19.71901302 |
| GO:0005794                | Golgi apparatus                                                             | 13 | 11.30 | 1.42E-06       | 5.673371282 |
| GO:0048046                | Apoplast                                                                    | 12 | 10.43 | 1.08E-09       | 12.9969851  |
| GO:0005739                | Mitochondrion                                                               | 12 | 10.43 | 0.0400643<br>8 | 1.885058907 |
| GO:0009506                | Plasmodesma                                                                 | 9  | 7.83  | 4.36E-04       | 4.777165653 |
| GO:0009579                | Thylakoid                                                                   | 8  | 6.96  | 9.13E-08       | 20.77835158 |
| GO:0016020                | Membrane                                                                    | 8  | 6.96  | 0.0434557<br>3 | 2.381936798 |
| GO:0005618                | Cell wall                                                                   | 7  | 6.09  | 6.74E-04       | 6.369554205 |
| GO:0009523                | Photosystem II                                                              | 6  | 5.22  | 1.03E-08       | 80.25638298 |
| GO:0005840                | Ribosome                                                                    | 5  | 4.35  | 0.0041973<br>1 | 7.431146572 |
| GO:0022626                | Cytosolic ribosome                                                          | 4  | 3.48  | 0.0061792<br>8 | 10.49103045 |
| GO:0009534                | Chloroplast thylakoid                                                       | 4  | 3.48  | 0.0063476      | 10.38917579 |
| GO:0009536                | Plastid                                                                     | 4  | 3.48  | 0.0179515<br>3 | 7.063268029 |
| GO:0005774                | Vacuolar membrane                                                           | 4  | 3.48  | 0.0745778<br>2 | 3.992854875 |
| GO:0045261                | Proton-transporting ATP synthase complex, catalytic core F(1)               | 3  | 2.61  | 1.46E-04       | 160.512766  |
| GO:0005747                | Mitochondrial respiratory chain complex I                                   | 3  | 2.61  | 0.0052416<br>2 | 27.20555355 |
| GO:0005623                | Cell                                                                        | 3  | 2.61  | 0.0482049<br>3 | 8.360039894 |
| GO:0000311                | Plastid large ribosomal subunit                                             | 2  | 1.74  | 0.0109264<br>8 | 178.3475177 |
| GO:0000275                | Mitochondrial proton-transporting ATP synthase complex, catalytic core F(1) | 2  | 1.74  | 0.0109264<br>8 | 178.3475177 |
| GO:0005753                | Mitochondrial proton-transporting atp synthase complex                      | 2  | 1.74  | 0.0270975<br>3 | 71.33900709 |
| GO:0030076                | Light-harvesting complex                                                    | 2  | 1.74  | 0.0359693<br>9 | 53.50425532 |
| GO:0009522                | Photosystem i                                                               | 2  | 1.74  | 0.0603916<br>8 | 31.47309136 |

|                           |                                                                                                                      |    |                 |                |             |
|---------------------------|----------------------------------------------------------------------------------------------------------------------|----|-----------------|----------------|-------------|
| GO:0010319                | stromule                                                                                                             | 2  | 1.74            | 0.0638308      | 29.72458629 |
| GO:0030687                | Preribosome, large subunit precursor                                                                                 | 2  | 1.74            | 0.0689663<br>9 | 27.43807965 |
| GO:0015935                | Small ribosomal subunit                                                                                              | 2  | 1.74            | 0.0892345<br>9 | 20.98206091 |
| <b>Molecular Function</b> |                                                                                                                      |    |                 |                |             |
| GO:0046872                | Metal ion binding                                                                                                    | 9  | 7.82608695<br>7 | 0.0415430<br>9 | 2.213695923 |
| GO:0003735                | Structural constituent of ribosome                                                                                   | 7  | 6.08695652<br>2 | 0.0010607<br>4 | 5.821372998 |
| GO:0046933                | Proton-transporting ATP synthase activity                                                                            | 5  | 4.34782608<br>7 | 8.58E-07       | 65.83695652 |
| GO:0016168                | Chlorophyll binding                                                                                                  | 5  | 4.34782608<br>7 | 2.04E-06       | 53.3813161  |
| GO:0005507                | Copper ion binding                                                                                                   | 4  | 3.47826087      | 0.0217178<br>6 | 6.556377413 |
| GO:0005506                | Iron ion binding                                                                                                     | 4  | 3.47826087      | 0.0502794<br>6 | 4.702639752 |
| GO:0016491                | Oxidoreductase activity                                                                                              | 4  | 3.47826087      | 0.0723197<br>3 | 4.041143111 |
| GO:0045156                | Electron transporter, transferring electrons within the cyclic electron transport pathway of photosynthesis activity | 3  | 2.60869565<br>2 | 2.14E-04       | 131.673913  |
| GO:0046961                | Proton-transporting ATPase activity, rotational mechanism                                                            | 3  | 2.60869565<br>2 | 0.0024960<br>9 | 39.50217391 |
| GO:0030170                | Pyridoxal phosphate binding                                                                                          | 3  | 2.60869565<br>2 | 0.0318968<br>6 | 10.48730281 |
| GO:0019843                | rRNA binding                                                                                                         | 3  | 2.60869565<br>2 | 0.0488565<br>2 | 8.287169352 |
| GO:0016615                | Malate dehydrogenase activity                                                                                        | 2  | 1.73913043<br>5 | 0.0196446<br>7 | 98.75543478 |
| GO:0030060                | L-malate dehydrogenase activity                                                                                      | 2  | 1.73913043<br>5 | 0.0220735<br>6 | 87.7826087  |
| GO:0070180                | Large ribosomal subunit rRNA binding                                                                                 | 2  | 1.73913043<br>5 | 0.0507652<br>6 | 37.62111801 |
| GO:0031409                | Pigment binding                                                                                                      | 2  | 1.73913043<br>5 | 0.0507652<br>6 | 37.62111801 |
| <b>CK vs CA+Cu25</b>      |                                                                                                                      |    |                 |                |             |
| <b>Biological Process</b> |                                                                                                                      |    |                 |                |             |
| GO:0046686                | Response to metal ion                                                                                                | 13 | 12.38           | 8.84E-12       | 16.35298518 |
| GO:0055114                | Oxidation-reduction process                                                                                          | 7  | 6.67            | 0.0780739<br>1 | 2.264259486 |
| GO:0015979                | Photosynthesis                                                                                                       | 4  | 3.81            | 0.0037698      | 12.46983485 |
| GO:0009735                | Response to cytokinin                                                                                                | 4  | 3.81            | 0.0082371<br>1 | 9.403482018 |

|                           |                                            |    |       |                |             |
|---------------------------|--------------------------------------------|----|-------|----------------|-------------|
| GO:0042742                | Defense response to bacterium              | 4  | 3.81  | 0.0245832<br>4 | 6.234917425 |
| GO:0006457                | Protein folding                            | 4  | 3.81  | 0.0274284<br>2 | 5.975129199 |
| GO:0009793                | Embryo development ending in seed dormancy | 4  | 3.81  | 0.0856659<br>9 | 3.749100674 |
| GO:0019253                | Reductive pentose-phosphate cycle          | 3  | 2.86  | 9.32E-04       | 64.53139535 |
| GO:0009853                | Photorespiration                           | 3  | 2.86  | 0.0057533<br>5 | 25.81255814 |
| GO:0006099                | Tricarboxylic acid cycle                   | 3  | 2.86  | 0.0064441<br>8 | 24.35146994 |
| GO:0009416                | Response to light stimulus                 | 3  | 2.86  | 0.0678818<br>3 | 6.865042058 |
| GO:0046034                | ATP metabolic process                      | 2  | 1.90  | 0.0157874<br>5 | 122.9169435 |
| GO:0015977                | Carbon fixation                            | 2  | 1.90  | 0.0180228<br>5 | 107.5523256 |
| GO:0046688                | Response to copper ion                     | 2  | 1.90  | 0.0466358<br>2 | 40.97231451 |
| GO:0007017                | Microtubule-based process                  | 2  | 1.90  | 0.0574227      | 33.09302326 |
| GO:0015991                | ATP hydrolysis coupled proton transport    | 2  | 1.90  | 0.0849140<br>4 | 22.0620155  |
| <b>Cellular Component</b> |                                            |    |       |                |             |
| GO:0009507                | Chloroplast                                | 31 | 29.52 | 4.14E-15       | 4.493771437 |
| GO:0005829                | Cytosol                                    | 26 | 24.76 | 2.64E-15       | 6.292497955 |
| GO:0009570                | Chloroplast stroma                         | 19 | 18.10 | 1.21E-17       | 16.25975838 |
| GO:0048046                | Apoplast                                   | 17 | 16.19 | 9.41E-17       | 19.23072425 |
| GO:0005737                | Cytoplasm                                  | 14 | 13.33 | 0.0346104<br>3 | 1.775246451 |
| GO:0016020                | Membrane                                   | 13 | 12.38 | 4.19E-05       | 4.042676065 |
| GO:0005739                | Mitochondrion                              | 13 | 12.38 | 0.0119660<br>6 | 2.132909245 |
| GO:0005886                | Plasma membrane                            | 13 | 12.38 | 0.0222074<br>9 | 1.96236869  |
| GO:0005794                | Golgi apparatus                            | 12 | 11.43 | 6.14E-06       | 5.4697118   |
| GO:0009506                | Plasmodesma                                | 11 | 10.48 | 7.34E-06       | 6.098258377 |
| GO:0009535                | Chloroplast thylakoid membrane             | 10 | 9.52  | 3.00E-08       | 13.73027573 |
| GO:0009941                | Chloroplast envelope                       | 10 | 9.52  | 3.46E-07       | 10.29138531 |
| GO:0009579                | Thylakoid                                  | 9  | 8.57  | 2.44E-09       | 24.41456311 |
| GO:0005773                | Vacuole                                    | 8  | 7.62  | 1.02E-04       | 7.107436849 |
| GO:0005774                | Vacuolar membrane                          | 7  | 6.67  | 3.24E-04       | 7.29805141  |
| GO:0005618                | Cell wall                                  | 7  | 6.67  | 5.28E-04       | 6.652645503 |
| GO:0009534                | Chloroplast thylakoid                      | 6  | 5.71  | 2.94E-05       | 16.2763754  |
| GO:0022626                | Cytosolic ribosome                         | 5  | 4.76  | 4.43E-04       | 13.69662309 |
| GO:0009536                | Plastid                                    | 5  | 4.76  | 0.0019196      | 9.221488816 |

|                           |                                                 |    |                 |                |             |
|---------------------------|-------------------------------------------------|----|-----------------|----------------|-------------|
| GO:0009543                | Chloroplast thylakoid lumen                     | 4  | 3.81            | 3.74E-04       | 27.94111111 |
| GO:0031977                | Thylakoid lumen                                 | 3  | 2.86            | 0.0036126<br>8 | 32.87189542 |
| GO:0005759                | Mitochondrial matrix                            | 3  | 2.86            | 0.0153727<br>9 | 15.52283951 |
| GO:0033180                | Proton-transporting V-type<br>ATPase, V1 domain | 2  | 1.90            | 0.0104534<br>9 | 186.2740741 |
| GO:0030095                | Chloroplast photosystem II                      | 2  | 1.90            | 0.0293415<br>6 | 65.74379085 |
| <b>Molecular Function</b> |                                                 |    |                 |                |             |
| GO:0005524                | ATP binding                                     | 12 | 11.4285714<br>3 | 0.0164790<br>7 | 2.137848543 |
| GO:0005507                | Copper ion binding                              | 6  | 5.71428571<br>4 | 2.24E-04       | 10.52069864 |
| GO:0005525                | GTP binding                                     | 6  | 5.71428571<br>4 | 5.41E-04       | 8.683179356 |
| GO:0003924                | GTPase activity                                 | 5  | 4.76190476<br>2 | 2.47E-04       | 15.88651862 |
| GO:0046933                | Proton-transporting ATP synthase<br>activity    | 3  | 2.85714285<br>7 | 0.0021775<br>2 | 42.25813953 |
| GO:0051287                | NAD binding                                     | 3  | 2.85714285<br>7 | 0.0123556<br>1 | 17.36635871 |
| GO:0016984                | Ribulose-bisphosphate<br>carboxylase activity   | 2  | 1.90476190<br>5 | 0.0115048<br>4 | 169.0325581 |
| GO:0002020                | Protease binding                                | 2  | 1.90476190<br>5 | 0.0318887<br>9 | 60.36877076 |
| GO:0008266                | Poly(U) RNA binding                             | 2  | 1.90476190<br>5 | 0.0430353      | 44.48225214 |
| GO:0046961                | Proton-transporting ATPase<br>activity          | 2  | 1.90476190<br>5 | 0.0671184<br>5 | 28.17209302 |
| GO:0005200                | Structural constituent of<br>cytoskeleton       | 2  | 1.90476190<br>5 | 0.0948182<br>1 | 19.65494862 |
| <b>CK vs Cu50</b>         |                                                 |    |                 |                |             |
| <b>Biological Process</b> |                                                 |    |                 |                |             |
| GO:0046686                | Response to metal ion                           | 4  | 5.26            | 0.0024161<br>2 | 13.52266082 |
| GO:0009735                | Response to cytokinin                           | 3  | 3.95            | 0.0093899<br>1 | 18.95389344 |
| GO:0009853                | Photorespiration                                | 2  | 2.63            | 0.0397993<br>6 | 46.2475     |
| <b>Cellular Component</b> |                                                 |    |                 |                |             |
| GO:0009507                | Chloroplast                                     | 11 | 14.47           | 1.01E-05       | 4.484711414 |
| GO:0005829                | Cytosol                                         | 8  | 10.53           | 1.81E-04       | 5.445430922 |
| GO:0009570                | Chloroplast stroma                              | 6  | 7.89            | 2.81E-05       | 14.44123277 |
| GO:0016020                | Membrane                                        | 5  | 6.58            | 0.0187562<br>4 | 4.37308709  |

|                           |                                         |    |       |                |             |
|---------------------------|-----------------------------------------|----|-------|----------------|-------------|
| GO:0009579                | Thylakoid                               | 4  | 5.26  | 2.29E-04       | 30.51820388 |
| GO:0048046                | Apoplast                                | 4  | 5.26  | 0.0028751<br>9 | 12.72621457 |
| GO:0009506                | Plasmodesma                             | 4  | 5.26  | 0.0203663<br>8 | 6.236855159 |
| GO:0005773                | Vacuole                                 | 3  | 3.95  | 0.0528944      | 7.496124801 |
| <b>Molecular Function</b> |                                         |    |       |                |             |
| GO:0003924                | GTPase activity                         | 2  | 2.63  | 0.0977690<br>6 | 18.21654135 |
| <b>CK vs Cu50</b>         |                                         |    |       |                |             |
| <b>Biological Process</b> |                                         |    |       |                |             |
| GO:0009409                | Response to cold                        | 7  | 6.80  | 3.77E-06       | 15.4673913  |
| GO:0055114                | Oxidation-reduction process             | 6  | 5.83  | 0.0408899<br>9 | 2.980504834 |
| GO:0019253                | Reductive pentose-phosphate cycle       | 4  | 3.88  | 3.11E-06       | 132.1357143 |
| GO:0015979                | Photosynthesis                          | 4  | 3.88  | 0.0010420<br>6 | 19.15010352 |
| GO:0042742                | Defense response to bacterium           | 4  | 3.88  | 0.0073736<br>2 | 9.57505176  |
| GO:0046686                | Response to cadmium ion                 | 4  | 3.88  | 0.0131903<br>7 | 7.727234754 |
| GO:0009651                | Response to stress                      | 4  | 3.88  | 0.0326929<br>4 | 5.460153483 |
| GO:0006096                | Glycolytic process                      | 3  | 2.91  | 0.0047912      | 27.91599598 |
| GO:0009416                | Response to light stimulus              | 3  | 2.91  | 0.0305293<br>7 | 10.54274316 |
| GO:0046034                | ATP metabolic process                   | 2  | 1.94  | 0.0101737<br>8 | 188.7653061 |
| GO:0006006                | Glucose metabolic process               | 2  | 1.94  | 0.0330552<br>4 | 57.45031056 |
| GO:0015991                | ATP hydrolysis coupled proton transport | 2  | 1.94  | 0.0554269<br>1 | 33.88095238 |
| GO:0009744                | Response to sucrose                     | 2  | 1.94  | 0.0732360<br>7 | 25.41071429 |
| GO:0006099                | Tricarboxylic acid cycle                | 2  | 1.94  | 0.0745925<br>3 | 24.93126685 |
| <b>Cellular Component</b> |                                         |    |       |                |             |
| GO:0009507                | Chloroplast                             | 21 | 20.39 | 1.46E-11       | 4.892412451 |
| GO:0005829                | Cytosol                                 | 17 | 16.50 | 1.18E-10       | 6.612308977 |
| GO:0005886                | Plasma membrane                         | 12 | 11.65 | 9.16E-04       | 2.911206298 |
| GO:0016020                | Membrane                                | 11 | 10.68 | 9.24E-06       | 5.497595198 |
| GO:0048046                | Apoplast                                | 10 | 9.71  | 1.39E-09       | 18.18030654 |
| GO:0009570                | Chloroplast stroma                      | 10 | 9.71  | 1.57E-08       | 13.75355502 |
| GO:0009506                | Plasmodesma                             | 9  | 8.74  | 7.29E-06       | 8.018813776 |
| GO:0005773                | Vacuole                                 | 8  | 7.77  | 3.40E-06       | 11.42266636 |

|                           |                                                                                                          |   |      |                |             |
|---------------------------|----------------------------------------------------------------------------------------------------------|---|------|----------------|-------------|
| GO:0005739                | Mitochondrion                                                                                            | 8 | 7.77 | 0.0633090<br>7 | 2.109470682 |
| GO:0009941                | Chloroplast envelope                                                                                     | 7 | 6.80 | 1.98E-05       | 11.57780847 |
| GO:0005794                | Golgi apparatus                                                                                          | 7 | 6.80 | 0.0016234<br>6 | 5.127854812 |
| GO:0010319                | Stromule                                                                                                 | 6 | 5.83 | 3.55E-10       | 149.6845238 |
| GO:0009579                | Thylakoid                                                                                                | 6 | 5.83 | 2.45E-06       | 26.15846047 |
| GO:0009535                | Chloroplast thylakoid membrane                                                                           | 6 | 5.83 | 6.52E-05       | 13.23990874 |
| GO:0005774                | Vacuolar membrane                                                                                        | 6 | 5.83 | 2.36E-04       | 10.05343817 |
| GO:0033180                | Proton-transporting V-type<br>ATPase, V1 domain                                                          | 2 | 1.94 | 0.0064254<br>9 | 299.3690476 |
| <b>Molecular Function</b> |                                                                                                          |   |      |                |             |
| GO:0051287                | NAD binding                                                                                              | 4 | 3.88 | 1.70E-04       | 35.55968689 |
| GO:0005507                | Copper ion binding                                                                                       | 3 | 2.91 | 0.0494781<br>9 | 8.078393598 |
| GO:0047100                | Glyceraldehyde-3-phosphate<br>dehydrogenase (NADP+)<br>(phosphorylating) activity                        | 2 | 1.94 | 0.0044512<br>8 | 432.6428571 |
| GO:0016620                | Oxidoreductase activity, acting on<br>the aldehyde or oxo group of<br>donors, NAD or NADP as<br>acceptor | 2 | 1.94 | 0.0147635<br>1 | 129.7928571 |
| GO:0050661                | NADP binding                                                                                             | 2 | 1.94 | 0.0827553<br>3 | 22.37807882 |
