# Supplementary material for: Proteome Changes Reveal the Protective Roles of Exogenous Citric Acid in Alleviating Cu Toxicity in Brassica napus L
Source: MDPI journal article supplement (doi:10.3390/ijms22115879), 2021-05-30
Supplement: s1 [file s1]

Table S7. List of significantly enriched KEGG pathways for the DAPs among the treatment groups in *B. napus* seedlings in response to CA-mediated Cu stress using DAVID Bioinformatics.

| Pathway ID           | Pathway Name                                | Number of proteins | Frequency | <i>p</i> -value | Fold Enrichment |
|----------------------|---------------------------------------------|--------------------|-----------|-----------------|-----------------|
| <b>CK vs CA</b>      |                                             |                    |           |                 |                 |
| ath01100             | Metabolic pathways                          | 31                 | 17.71     | 0.00280982<br>5 | 1.53738092<br>2 |
| ath01200             | Carbon metabolism                           | 10                 | 5.71      | 0.00167737<br>4 | 3.46961244<br>9 |
| ath01130             | Biosynthesis of antibiotics                 | 10                 | 5.71      | 0.04273955<br>5 | 2.07070264<br>6 |
| ath00195             | Photosynthesis                              | 8                  | 4.57      | 1.50E-05        | 9.44455544<br>5 |
| ath00710             | Carbon fixation in photosynthetic organisms | 5                  | 2.86      | 0.00620289<br>5 | 6.58723522<br>9 |
| ath00630             | Glyoxylate and dicarboxylate metabolism     | 5                  | 2.86      | 0.00793641<br>4 | 6.14215176<br>7 |
| ath00270             | Cysteine and methionine metabolism          | 5                  | 2.86      | 0.02132960<br>1 | 4.59110334<br>1 |
| ath00190             | Oxidative phosphorylation                   | 5                  | 2.86      | 0.09598168<br>5 | 2.80567426<br>4 |
| ath00196             | Photosynthesis - antenna proteins           | 3                  | 1.71      | 0.02297359<br>3 | 12.3959790<br>2 |
| <b>CK vs Cu25</b>    |                                             |                    |           |                 |                 |
| ath01100             | Metabolic pathways                          | 28                 | 24.35     | 6.88E-04        | 1.67923977<br>7 |
| ath01130             | Biosynthesis of antibiotics                 | 8                  | 6.96      | 0.08939693<br>8 | 2.00328442      |
| ath00195             | Photosynthesis                              | 7                  | 6.09      | 5.05E-05        | 9.99365750<br>5 |
| ath01200             | Carbon metabolism                           | 7                  | 6.09      | 0.02673302<br>5 | 2.93706728<br>2 |
| ath00190             | Oxidative phosphorylation                   | 6                  | 5.22      | 0.01356800<br>2 | 4.07149009<br>5 |
| ath00710             | Carbon fixation in photosynthetic organisms | 5                  | 4.35      | 0.00306524      | 7.96595888<br>1 |
| ath00630             | Glyoxylate and dicarboxylate metabolism     | 4                  | 3.48      | 0.02732902<br>3 | 5.94217473<br>3 |
| ath00270             | Cysteine and methionine metabolism          | 4                  | 3.48      | 0.0568231       | 4.44162555<br>8 |
| <b>CK vs CA+Cu25</b> |                                             |                    |           |                 |                 |
| ath01200             | Carbon metabolism                           | 13                 | 12.38     | 1.74E-07        | 6.51516115<br>4 |
| ath00630             | Glyoxylate and dicarboxylate metabolism     | 8                  | 7.62      | 8.19E-07        | 14.1951952      |

|                      |                                             |    |       |                 |                 |
|----------------------|---------------------------------------------|----|-------|-----------------|-----------------|
| ath01100             | Metabolic pathways                          | 25 | 23.81 | 3.28E-04        | 1.79085591<br>3 |
| ath00710             | Carbon fixation in photosynthetic organisms | 5  | 4.76  | 0.00154815<br>5 | 9.51489533      |
| ath01130             | Biosynthesis of antibiotics                 | 10 | 9.52  | 0.00372554<br>6 | 2.99101493<br>3 |
| ath00260             | Glycine, serine and threonine metabolism    | 4  | 3.81  | 0.01564773<br>5 | 7.29475308<br>6 |
| ath00195             | Photosynthesis                              | 4  | 3.81  | 0.01871631<br>4 | 6.82106782<br>1 |
| ath04145             | Phagosome                                   | 4  | 3.81  | 0.02427748<br>5 | 6.17908496<br>7 |
| ath01230             | Biosynthesis of amino acids                 | 6  | 5.71  | 0.03730939<br>8 | 3.10170603<br>7 |
| ath00020             | Citrate cycle (TCA cycle)                   | 3  | 2.86  | 0.07855724<br>2 | 6.25264550<br>3 |
| <b>CK vs Cu50</b>    |                                             |    |       |                 |                 |
| ath01100             | Metabolic pathways                          | 8  | 10.53 | 0.08486623<br>5 | 1.71922167<br>7 |
| <b>CK vs CA+Cu50</b> |                                             |    |       |                 |                 |
| ath01200             | Carbon metabolism                           | 8  | 7.77  | 1.23E-04        | 6.27547295<br>1 |
| ath00710             | Carbon fixation in photosynthetic organisms | 5  | 4.85  | 2.50E-04        | 14.8928796<br>5 |
| ath01100             | Metabolic pathways                          | 15 | 14.56 | 0.01577568<br>2 | 1.68184729<br>2 |
| ath04145             | Phagosome                                   | 3  | 2.91  | 0.05851030<br>3 | 7.25370844      |
| ath00010             | Glycolysis/Gluconeogenesis                  | 3  | 2.91  | 0.09598043<br>6 | 5.45632935<br>7 |
