# Supplementary material for: Proteome Changes Reveal the Protective Roles of Exogenous Citric Acid in Alleviating Cu Toxicity in Brassica napus L
Source: MDPI journal article supplement (doi:10.3390/ijms22115879), 2021-05-30
Supplement: s1 [file s1]

**Table S1. Primers used for qRT-PCR analysis**

| Protein Accession | Description                                  | Primer | Sequence             |
|-------------------|----------------------------------------------|--------|----------------------|
| Q8L7C9            | Glutathione S-transferase U20                | F      | TACTTGGGTCACTGGCCATC |
|                   |                                              | R      | TGGACGAATCCAGCCTATTC |
| Q05431            | L-ascorbate peroxidase 1                     | F      | ATGAGGTTTGACGGTGAGC  |
|                   |                                              | R      | CAGCATGGGAGATGGTAGG  |
| A1E9T2            | Ribulose biphosphate carboxylase large chain | F      | ACCGTTACAAAGGACGATGC |
|                   |                                              | R      | CAGGGCTTTGAACCCAAATA |
| P27141            | Carbonic anhydrase                           | F      | AAGAGATGGGTAGCGAAGCA |
|                   |                                              | R      | CGTACAAAGCAGGGTTGGTT |
| O49485            | D-3-phosphoglycerate dehydrogenase 1         | F      | CTCTGGATGCGGGTATTGTT |
|                   |                                              | R      | TTTCAATGGCAACTCCTTCC |
| P51823            | ADP-ribosylation factor 2                    | F      | ATGACAGCACTATGAC     |
|                   |                                              | R      | CGAGGTGATGTGAATA     |
